# Supplementary material
Source: PubMed Central journal article supplement (PMC3064541)
Supplement: supp_mcr009_mcr009supp_tables.pdf [file supp_mcr009_mcr009supp_tables.pdf]

## SUPPLEMENTARY DATA

TABLE S1a. Mean tuber mineral concentrations of *Solanum tuberosum* 'Stirling' (dry weight).

| Code | Total samples | % DM  | Mg (mg g <sup>-1</sup> ) | P (mg g <sup>-1</sup> ) | S (mg g <sup>-1</sup> ) | K (mg g <sup>-1</sup> ) | Zn (µg g <sup>-1</sup> ) | Ca (mg g <sup>-1</sup> ) | Mn (µg g <sup>-1</sup> ) | Fe (µg g <sup>-1</sup> ) | Cl (mg g <sup>-1</sup> ) | Cu (µg g <sup>-1</sup> ) |
|------|---------------|-------|--------------------------|-------------------------|-------------------------|-------------------------|--------------------------|--------------------------|--------------------------|--------------------------|--------------------------|--------------------------|
| S01  | 1             | 15.13 | 1.83                     | 3.37                    | 1.01                    | 37.71                   | 28.57                    | 2.33                     | 15.59                    | 314.92                   | 0.48                     | 10.69                    |
| S02  | 2             | 14.04 | 1.97                     | 3.65                    | 1.00                    | 40.84                   | 33.91                    | 2.36                     | 17.86                    | 318.89                   | 0.86                     | 10.58                    |
| S03  | 3             | 13.21 | 2.09                     | 3.68                    | 1.08                    | 42.84                   | 37.80                    | 2.38                     | 20.41                    | 345.64                   | 0.96                     | 11.40                    |
| S04  | 4             | 13.89 | 2.02                     | 3.61                    | 1.00                    | 41.00                   | 35.06                    | 2.21                     | 18.26                    | 278.66                   | 1.30                     | 10.32                    |
| S05  | 5             | 15.30 | 1.62                     | 2.93                    | 1.04                    | 34.04                   | 28.67                    | 1.84                     | 15.49                    | 279.70                   | 1.23                     | 7.93                     |
| A11  | 6             | 21.24 | 0.88                     | 2.73                    | 0.86                    | 25.69                   | 8.45                     | 0.35                     | 4.65                     | 14.80                    | 0.37                     | 4.65                     |
| A12  | 7             | 19.75 | 0.89                     | 2.82                    | 0.87                    | 23.98                   | 8.87                     | 0.34                     | 4.89                     | 15.95                    | 0.31                     | 4.70                     |
| A13  | 8             | 21.71 | 0.91                     | 2.93                    | 1.05                    | 22.67                   | 8.99                     | 0.32                     | 4.67                     | 15.36                    | 0.41                     | 4.87                     |
| A14  | 9             | 22.40 | 0.91                     | 2.91                    | 0.96                    | 20.22                   | 8.90                     | 0.33                     | 4.12                     | 16.89                    | 0.47                     | 4.41                     |
| A15  | 10            | 22.69 | 0.88                     | 2.93                    | 0.80                    | 17.06                   | 8.55                     | 0.32                     | 3.22                     | 15.29                    | 0.41                     | 3.77                     |
| A21  | 11            | 20.54 | 1.00                     | 2.85                    | 1.04                    | 27.80                   | 9.08                     | 0.31                     | 5.35                     | 14.53                    | 0.28                     | 4.49                     |
| A22  | 12            | 19.58 | 0.93                     | 2.64                    | 0.99                    | 24.09                   | 9.21                     | 0.24                     | 4.95                     | 13.93                    | 0.36                     | 4.44                     |
| A23  | 13            | 19.78 | 0.98                     | 2.72                    | 1.02                    | 23.51                   | 10.01                    | 0.27                     | 5.47                     | 17.25                    | 0.42                     | 4.62                     |
| A24  | 14            | 20.34 | 0.99                     | 2.75                    | 1.05                    | 19.69                   | 9.53                     | 0.22                     | 5.32                     | 15.67                    | 0.39                     | 4.23                     |
| A25  | 15            | 20.80 | 1.20                     | 2.83                    | 1.24                    | 18.36                   | 9.27                     | 0.30                     | 5.61                     | 19.98                    | 0.49                     | 4.08                     |
| A31  | 16            | 19.47 | 1.03                     | 2.92                    | 1.06                    | 27.72                   | 9.12                     | 0.31                     | 5.20                     | 13.46                    | 0.27                     | 4.35                     |
| A32  | 17            | 19.23 | 1.02                     | 2.72                    | 1.18                    | 24.14                   | 9.40                     | 0.21                     | 5.08                     | 15.27                    | 0.40                     | 4.54                     |
| A33  | 18            | 19.73 | 1.02                     | 2.57                    | 1.29                    | 21.30                   | 9.53                     | 0.20                     | 5.27                     | 15.63                    | 0.44                     | 4.39                     |
| A34  | 19            | 19.63 | 1.11                     | 2.61                    | 1.27                    | 19.41                   | 10.06                    | 0.20                     | 6.45                     | 17.58                    | 0.50                     | 4.47                     |
| A35  | 20            | 19.70 | 1.28                     | 2.71                    | 1.28                    | 16.72                   | 11.44                    | 0.28                     | 7.02                     | 19.59                    | 0.47                     | 3.96                     |
| A41  | 21            | 20.40 | 0.95                     | 2.93                    | 0.83                    | 26.88                   | 8.83                     | 0.30                     | 5.07                     | 11.37                    | 0.28                     | 4.20                     |
| A42  | 22            | 20.20 | 0.94                     | 2.58                    | 1.10                    | 22.83                   | 9.24                     | 0.23                     | 5.13                     | 11.87                    | 0.32                     | 4.23                     |
| A43  | 23            | 21.05 | 0.97                     | 2.40                    | 1.10                    | 19.58                   | 9.04                     | 0.21                     | 5.33                     | 16.90                    | 0.53                     | 3.90                     |
| A44  | 24            | 21.31 | 1.09                     | 2.53                    | 1.17                    | 17.21                   | 10.08                    | 0.19                     | 6.19                     | 16.47                    | 0.43                     | 3.82                     |
| A45  | 25            | 21.86 | 1.04                     | 2.62                    | 1.04                    | 16.35                   | 10.11                    | 0.29                     | 5.74                     | 18.10                    | 0.32                     | 3.72                     |
| A51  | 26            | 22.06 | 0.90                     | 2.85                    | 0.87                    | 24.09                   | 9.91                     | 0.36                     | 4.37                     | 14.34                    | 0.23                     | 4.65                     |
| A52  | 27            | 21.67 | 0.89                     | 2.71                    | 0.86                    | 23.07                   | 9.66                     | 0.33                     | 4.45                     | 14.49                    | 0.23                     | 4.51                     |
| A53  | 28            | 22.45 | 0.86                     | 2.63                    | 0.83                    | 20.27                   | 9.48                     | 0.32                     | 4.16                     | 15.34                    | 0.28                     | 4.27                     |
| A54  | 29            | 23.08 | 0.88                     | 2.79                    | 0.95                    | 19.16                   | 9.37                     | 0.31                     | 4.01                     | 15.77                    | 0.26                     | 4.50                     |
| A55  | 30            | 23.93 | 0.81                     | 2.72                    | 0.84                    | 16.09                   | 7.67                     | 0.33                     | 2.86                     | 16.99                    | 0.32                     | 3.60                     |

| Code | Total samples | % DM  | Mg (mg g <sup>-1</sup> ) | P (mg g <sup>-1</sup> ) | S (mg g <sup>-1</sup> ) | K (mg g <sup>-1</sup> ) | Zn (µg g <sup>-1</sup> ) | Ca (mg g <sup>-1</sup> ) | Mn (µg g <sup>-1</sup> ) | Fe (µg g <sup>-1</sup> ) | Cl (mg g <sup>-1</sup> ) | Cu (µg g <sup>-1</sup> ) |
|------|---------------|-------|--------------------------|-------------------------|-------------------------|-------------------------|--------------------------|--------------------------|--------------------------|--------------------------|--------------------------|--------------------------|
| B11  | 31            | 21.03 | 0.93                     | 2.79                    | 0.87                    | 25.16                   | 9.52                     | 0.34                     | 4.88                     | 14.48                    | 0.22                     | 4.57                     |
| B12  | 32            | 22.31 | 0.93                     | 2.56                    | 1.05                    | 21.82                   | 9.28                     | 0.23                     | 5.13                     | 14.26                    | 0.25                     | 4.16                     |
| B13  | 33            | 22.18 | 0.90                     | 2.43                    | 1.05                    | 19.49                   | 9.18                     | 0.22                     | 5.07                     | 14.27                    | 0.36                     | 4.01                     |
| B14  | 34            | 21.54 | 0.98                     | 2.71                    | 1.09                    | 19.13                   | 9.55                     | 0.22                     | 5.66                     | 16.05                    | 0.44                     | 4.16                     |
| B15  | 35            | 22.79 | 0.95                     | 2.62                    | 1.08                    | 16.33                   | 8.50                     | 0.26                     | 4.52                     | 15.32                    | 0.49                     | 3.74                     |
| B21  | 36            | 19.79 | 1.00                     | 2.74                    | 1.04                    | 28.77                   | 8.99                     | 0.26                     | 5.22                     | 12.13                    | 0.29                     | 3.85                     |
| B22  | 37            | 15.23 | 1.17                     | 2.68                    | 1.67                    | 28.32                   | 11.46                    | 0.20                     | 4.76                     | 18.24                    | 0.34                     | 5.01                     |
| B23  | 38            | 13.58 | 1.38                     | 3.03                    | 1.95                    | 28.58                   | 13.80                    | 0.22                     | 5.76                     | 21.37                    | 0.43                     | 5.42                     |
| B24  | 39            | 14.96 | 1.46                     | 3.04                    | 1.92                    | 23.98                   | 14.17                    | 0.20                     | 7.62                     | 22.79                    | 0.55                     | 4.99                     |
| B25  | 40            | 17.72 | 1.46                     | 2.82                    | 1.72                    | 18.56                   | 12.59                    | 0.26                     | 8.57                     | 22.52                    | 0.55                     | 4.13                     |
| B31  | 41            | 17.17 | 1.11                     | 2.97                    | 1.41                    | 33.02                   | 11.04                    | 0.32                     | 5.60                     | 13.40                    | 0.33                     | 4.60                     |
| B32  | 42            | 12.01 | 1.45                     | 3.63                    | 2.07                    | 38.07                   | 15.03                    | 0.34                     | 5.65                     | 19.92                    | 0.53                     | 6.57                     |
| B33  | 43            | 10.34 | 1.82                     | 4.33                    | 2.39                    | 37.31                   | 17.77                    | 0.34                     | 7.80                     | 25.94                    | 0.65                     | 6.81                     |
| B34  | 44            | 11.36 | 1.92                     | 4.04                    | 2.36                    | 30.70                   | 18.11                    | 0.33                     | 8.86                     | 26.85                    | 0.67                     | 5.70                     |
| B35  | 45            | 16.08 | 1.58                     | 2.98                    | 1.90                    | 20.26                   | 14.33                    | 0.34                     | 9.08                     | 27.97                    | 0.64                     | 4.31                     |
| B41  | 46            | 19.79 | 0.98                     | 2.79                    | 1.20                    | 27.30                   | 9.18                     | 0.26                     | 5.25                     | 13.81                    | 0.27                     | 4.13                     |
| B42  | 47            | 15.58 | 1.17                     | 2.78                    | 1.65                    | 27.64                   | 11.27                    | 0.19                     | 4.92                     | 18.19                    | 0.50                     | 5.03                     |
| B43  | 48            | 13.74 | 1.23                     | 2.71                    | 1.70                    | 24.77                   | 11.62                    | 0.17                     | 5.37                     | 19.34                    | 0.46                     | 4.66                     |
| B44  | 49            | 15.98 | 1.26                     | 2.56                    | 1.79                    | 20.23                   | 12.32                    | 0.17                     | 7.12                     | 22.07                    | 0.41                     | 4.19                     |
| B45  | 50            | 20.28 | 1.06                     | 2.50                    | 1.29                    | 16.57                   | 9.56                     | 0.26                     | 6.00                     | 17.07                    | 0.47                     | 3.66                     |
| B51  | 51            | 22.89 | 0.87                     | 2.70                    | 0.82                    | 22.71                   | 7.92                     | 0.29                     | 4.45                     | 12.51                    | 0.27                     | 3.96                     |
| B52  | 52            | 20.87 | 0.90                     | 2.63                    | 0.93                    | 23.35                   | 8.73                     | 0.27                     | 5.01                     | 14.24                    | 0.31                     | 4.24                     |
| B53  | 53            | 21.32 | 0.87                     | 2.58                    | 0.95                    | 22.02                   | 8.75                     | 0.26                     | 5.00                     | 14.80                    | 0.35                     | 4.32                     |
| B54  | 54            | 22.47 | 0.84                     | 2.36                    | 0.79                    | 18.44                   | 7.88                     | 0.25                     | 4.40                     | 13.06                    | 0.36                     | 3.72                     |
| B55  | 55            | 22.72 | 0.83                     | 2.77                    | 0.71                    | 19.17                   | 8.78                     | 0.33                     | 3.70                     | 13.92                    | 0.36                     | 4.47                     |
| C11  | 56            | 22.40 | 0.90                     | 2.90                    | 0.73                    | 25.07                   | 9.36                     | 0.33                     | 4.30                     | 11.41                    | 0.18                     | 4.23                     |
| C12  | 57            | 21.41 | 0.87                     | 2.78                    | 0.73                    | 23.35                   | 8.94                     | 0.30                     | 4.36                     | 11.31                    | 0.17                     | 4.38                     |
| C13  | 58            | 21.48 | 0.86                     | 2.66                    | 0.79                    | 21.63                   | 8.03                     | 0.28                     | 4.65                     | 12.42                    | 0.21                     | 4.04                     |
| C14  | 59            | 23.13 | 0.83                     | 2.60                    | 0.84                    | 19.12                   | 7.80                     | 0.26                     | 4.14                     | 11.89                    | 0.28                     | 4.13                     |
| C15  | 60            | 23.91 | 0.83                     | 2.65                    | 0.69                    | 17.64                   | 8.04                     | 0.31                     | 3.20                     | 11.22                    | 0.27                     | 3.67                     |

| Code             | Total samples | % DM  | Mg (mg g <sup>-1</sup> ) | P (mg g <sup>-1</sup> ) | S (mg g <sup>-1</sup> ) | K (mg g <sup>-1</sup> ) | Zn (µg g <sup>-1</sup> ) | Ca (mg g <sup>-1</sup> ) | Mn (µg g <sup>-1</sup> ) | Fe (µg g <sup>-1</sup> ) | Cl (mg g <sup>-1</sup> ) | Cu (µg g <sup>-1</sup> ) |
|------------------|---------------|-------|--------------------------|-------------------------|-------------------------|-------------------------|--------------------------|--------------------------|--------------------------|--------------------------|--------------------------|--------------------------|
| C21              | 61            | 20.56 | 0.90                     | 2.84                    | 0.86                    | 26.80                   | 8.26                     | 0.27                     | 4.56                     | 9.39                     | 0.14                     | 3.95                     |
| C22              | 62            | 19.38 | 0.93                     | 2.70                    | 1.04                    | 24.04                   | 9.47                     | 0.21                     | 4.94                     | 11.63                    | 0.24                     | 4.03                     |
| C23              | 63            | 19.15 | 0.94                     | 2.56                    | 1.00                    | 21.44                   | 9.02                     | 0.20                     | 5.32                     | 12.32                    | 0.17                     | 3.99                     |
| C24              | 64            | 20.84 | 1.00                     | 2.52                    | 1.06                    | 18.52                   | 8.85                     | 0.19                     | 5.66                     | 13.25                    | 0.37                     | 3.82                     |
| C25              | 65            | 21.80 | 1.00                     | 2.73                    | 0.87                    | 17.14                   | 8.38                     | 0.26                     | 4.87                     | 12.58                    | 0.30                     | 3.93                     |
| C31              | 66            | 19.73 | 0.90                     | 2.83                    | 0.92                    | 26.92                   | 8.80                     | 0.28                     | 4.52                     | 10.27                    | 0.20                     | 4.18                     |
| C32              | 67            | 18.74 | 0.93                     | 2.52                    | 1.02                    | 23.55                   | 8.70                     | 0.21                     | 4.80                     | 12.77                    | 0.28                     | 4.21                     |
| C33              | 68            | 19.32 | 1.02                     | 2.58                    | 1.10                    | 21.56                   | 9.56                     | 0.21                     | 5.33                     | 14.48                    | 0.30                     | 4.03                     |
| C34              | 69            | 19.38 | 1.11                     | 2.62                    | 1.27                    | 19.04                   | 9.86                     | 0.19                     | 5.84                     | 16.04                    | 0.36                     | 3.89                     |
| C35              | 70            | 21.14 | 1.05                     | 2.62                    | 1.05                    | 16.46                   | 9.55                     | 0.25                     | 5.63                     | 15.75                    | 0.31                     | 3.73                     |
| C41              | 71            | 19.97 | 0.89                     | 2.85                    | 0.78                    | 26.40                   | 8.52                     | 0.30                     | 4.58                     | 12.57                    | 0.14                     | 4.40                     |
| C42              | 72            | 18.92 | 0.90                     | 2.52                    | 0.88                    | 22.67                   | 8.50                     | 0.23                     | 4.93                     | 12.29                    | 0.21                     | 4.08                     |
| C43              | 73            | 19.92 | 0.95                     | 2.53                    | 1.06                    | 20.88                   | 9.13                     | 0.21                     | 5.47                     | 14.54                    | 0.26                     | 4.30                     |
| C44              | 74            | 20.46 | 0.96                     | 2.29                    | 0.96                    | 18.15                   | 8.85                     | 0.19                     | 5.29                     | 14.03                    | 0.30                     | 3.73                     |
| C45              | 75            | 22.45 | 0.93                     | 2.56                    | 0.85                    | 16.50                   | 8.39                     | 0.27                     | 4.63                     | 14.89                    | 0.41                     | 3.76                     |
| C51              | 76            | 22.35 | 0.81                     | 2.85                    | 0.56                    | 23.62                   | 8.99                     | 0.39                     | 3.81                     | 13.07                    | 0.18                     | 4.70                     |
| C52              | 77            | 21.99 | 0.79                     | 2.61                    | 0.64                    | 21.62                   | 7.90                     | 0.28                     | 4.02                     | 12.60                    | 0.20                     | 4.22                     |
| C53              | 78            | 22.08 | 0.79                     | 2.59                    | 0.69                    | 20.15                   | 7.99                     | 0.27                     | 3.80                     | 13.22                    | 0.23                     | 4.13                     |
| C54              | 79            | 22.39 | 0.82                     | 2.74                    | 0.73                    | 19.46                   | 9.16                     | 0.26                     | 4.03                     | 14.76                    | 0.26                     | 4.23                     |
| C55              | 80            | 22.91 | 0.81                     | 2.79                    | 0.72                    | 18.54                   | 7.82                     | 0.34                     | 3.29                     | 14.75                    | 0.30                     | 4.29                     |
| s. e.<br>(flesh) |               | 0.94  | 0.08                     | 0.17                    | 0.14                    | 1.45                    | 0.85                     | 0.03                     | 0.52                     | 2.19                     | 0.10                     | 0.35                     |

Mean of five tubers. s.e., standard errors of differences of the means. S01–S05, skin, apex to base. A11–C55, flesh. A11 is top slice A, right strip 1, apical piece 1 in strip 1.

TABLE S1b. Mean tuber mineral concentrations of *Solanum tuberosum* 'Stirling' (fresh weight).

| Code | Total samples | Mg (mg g <sup>-1</sup> ) | P (mg g <sup>-1</sup> ) | S (mg g <sup>-1</sup> ) | K (mg g <sup>-1</sup> ) | Zn (µg g <sup>-1</sup> ) | Ca (mg g <sup>-1</sup> ) | Mn (µg g <sup>-1</sup> ) | Fe (µg g <sup>-1</sup> ) | Cl (mg g <sup>-1</sup> ) | Cu (µg g <sup>-1</sup> ) |
|------|---------------|--------------------------|-------------------------|-------------------------|-------------------------|--------------------------|--------------------------|--------------------------|--------------------------|--------------------------|--------------------------|
| S01  | 1             | 0.28                     | 0.51                    | 0.15                    | 5.70                    | 4.31                     | 0.35                     | 2.34                     | 47.05                    | 0.07                     | 1.62                     |
| S02  | 2             | 0.27                     | 0.51                    | 0.14                    | 5.73                    | 4.66                     | 0.32                     | 2.44                     | 42.53                    | 0.12                     | 1.48                     |
| S03  | 3             | 0.28                     | 0.48                    | 0.14                    | 5.67                    | 4.95                     | 0.31                     | 2.70                     | 45.47                    | 0.13                     | 1.51                     |
| S04  | 4             | 0.28                     | 0.50                    | 0.14                    | 5.70                    | 4.86                     | 0.31                     | 2.53                     | 38.79                    | 0.18                     | 1.43                     |
| S05  | 5             | 0.25                     | 0.45                    | 0.16                    | 5.22                    | 4.37                     | 0.28                     | 2.36                     | 42.95                    | 0.18                     | 1.21                     |
| A11  | 6             | 0.19                     | 0.58                    | 0.18                    | 5.44                    | 1.79                     | 0.07                     | 0.99                     | 3.10                     | 0.08                     | 0.98                     |
| A12  | 7             | 0.18                     | 0.54                    | 0.17                    | 4.74                    | 1.71                     | 0.07                     | 0.95                     | 3.04                     | 0.07                     | 0.91                     |
| A13  | 8             | 0.20                     | 0.64                    | 0.23                    | 4.90                    | 1.95                     | 0.07                     | 1.02                     | 3.32                     | 0.09                     | 1.05                     |
| A14  | 9             | 0.20                     | 0.65                    | 0.22                    | 4.52                    | 2.00                     | 0.07                     | 0.92                     | 3.79                     | 0.10                     | 0.99                     |
| A15  | 10            | 0.19                     | 0.67                    | 0.18                    | 3.80                    | 1.92                     | 0.07                     | 0.72                     | 3.38                     | 0.09                     | 0.85                     |
| A21  | 11            | 0.21                     | 0.58                    | 0.21                    | 5.71                    | 1.86                     | 0.06                     | 1.10                     | 2.96                     | 0.06                     | 0.92                     |
| A22  | 12            | 0.18                     | 0.52                    | 0.19                    | 4.68                    | 1.81                     | 0.05                     | 0.98                     | 2.72                     | 0.07                     | 0.87                     |
| A23  | 13            | 0.19                     | 0.54                    | 0.20                    | 4.64                    | 1.98                     | 0.05                     | 1.08                     | 3.41                     | 0.08                     | 0.91                     |
| A24  | 14            | 0.20                     | 0.56                    | 0.21                    | 3.97                    | 1.93                     | 0.04                     | 1.08                     | 3.21                     | 0.08                     | 0.85                     |
| A25  | 15            | 0.24                     | 0.59                    | 0.26                    | 3.80                    | 1.92                     | 0.06                     | 1.15                     | 4.16                     | 0.10                     | 0.85                     |
| A31  | 16            | 0.20                     | 0.57                    | 0.21                    | 5.36                    | 1.76                     | 0.06                     | 1.01                     | 2.65                     | 0.05                     | 0.84                     |
| A32  | 17            | 0.19                     | 0.53                    | 0.22                    | 4.62                    | 1.81                     | 0.04                     | 0.97                     | 2.85                     | 0.08                     | 0.86                     |
| A33  | 18            | 0.20                     | 0.51                    | 0.25                    | 4.20                    | 1.87                     | 0.04                     | 1.03                     | 3.03                     | 0.08                     | 0.86                     |
| A34  | 19            | 0.22                     | 0.51                    | 0.25                    | 3.80                    | 1.97                     | 0.04                     | 1.26                     | 3.47                     | 0.10                     | 0.87                     |
| A35  | 20            | 0.25                     | 0.53                    | 0.25                    | 3.28                    | 2.23                     | 0.06                     | 1.37                     | 3.85                     | 0.09                     | 0.78                     |
| A41  | 21            | 0.19                     | 0.60                    | 0.17                    | 5.45                    | 1.79                     | 0.06                     | 1.03                     | 2.31                     | 0.06                     | 0.85                     |
| A42  | 22            | 0.19                     | 0.52                    | 0.22                    | 4.56                    | 1.87                     | 0.05                     | 1.02                     | 2.32                     | 0.06                     | 0.84                     |
| A43  | 23            | 0.20                     | 0.51                    | 0.23                    | 4.10                    | 1.90                     | 0.04                     | 1.11                     | 3.54                     | 0.11                     | 0.81                     |
| A44  | 24            | 0.23                     | 0.54                    | 0.25                    | 3.62                    | 2.15                     | 0.04                     | 1.31                     | 3.50                     | 0.09                     | 0.81                     |
| A45  | 25            | 0.22                     | 0.57                    | 0.22                    | 3.49                    | 2.19                     | 0.06                     | 1.23                     | 3.90                     | 0.07                     | 0.81                     |
| A51  | 26            | 0.20                     | 0.63                    | 0.19                    | 5.30                    | 2.17                     | 0.08                     | 0.96                     | 3.13                     | 0.05                     | 1.01                     |
| A52  | 27            | 0.19                     | 0.58                    | 0.19                    | 4.98                    | 2.08                     | 0.07                     | 0.96                     | 3.13                     | 0.05                     | 0.97                     |
| A53  | 28            | 0.19                     | 0.59                    | 0.19                    | 4.55                    | 2.13                     | 0.07                     | 0.93                     | 3.44                     | 0.06                     | 0.96                     |
| A54  | 29            | 0.20                     | 0.64                    | 0.22                    | 4.42                    | 2.16                     | 0.07                     | 0.92                     | 3.65                     | 0.06                     | 1.03                     |
| A55  | 30            | 0.19                     | 0.65                    | 0.19                    | 3.74                    | 1.79                     | 0.08                     | 0.66                     | 4.08                     | 0.07                     | 0.84                     |

| Code | Total samples | Mg (mg g <sup>-1</sup> ) | P (mg g <sup>-1</sup> ) | S (mg g <sup>-1</sup> ) | K (mg g <sup>-1</sup> ) | Zn (µg g <sup>-1</sup> ) | Ca (mg g <sup>-1</sup> ) | Mn (µg g <sup>-1</sup> ) | Fe (µg g <sup>-1</sup> ) | Cl (mg g <sup>-1</sup> ) | Cu (µg g <sup>-1</sup> ) |
|------|---------------|--------------------------|-------------------------|-------------------------|-------------------------|--------------------------|--------------------------|--------------------------|--------------------------|--------------------------|--------------------------|
| B11  | 31            | 0.19                     | 0.58                    | 0.18                    | 5.26                    | 1.99                     | 0.07                     | 1.02                     | 3.06                     | 0.04                     | 0.95                     |
| B12  | 32            | 0.21                     | 0.57                    | 0.23                    | 4.88                    | 2.06                     | 0.05                     | 1.14                     | 3.14                     | 0.06                     | 0.93                     |
| B13  | 33            | 0.20                     | 0.54                    | 0.23                    | 4.33                    | 2.03                     | 0.05                     | 1.12                     | 3.14                     | 0.08                     | 0.89                     |
| B14  | 34            | 0.21                     | 0.58                    | 0.23                    | 4.12                    | 2.04                     | 0.05                     | 1.21                     | 3.44                     | 0.09                     | 0.89                     |
| B15  | 35            | 0.22                     | 0.60                    | 0.25                    | 3.72                    | 1.94                     | 0.06                     | 1.03                     | 3.51                     | 0.11                     | 0.85                     |
| B21  | 36            | 0.20                     | 0.54                    | 0.21                    | 5.69                    | 1.78                     | 0.05                     | 1.04                     | 2.40                     | 0.06                     | 0.76                     |
| B22  | 37            | 0.18                     | 0.41                    | 0.25                    | 4.31                    | 1.74                     | 0.03                     | 0.72                     | 2.76                     | 0.05                     | 0.76                     |
| B23  | 38            | 0.19                     | 0.41                    | 0.26                    | 3.88                    | 1.85                     | 0.03                     | 0.77                     | 2.87                     | 0.06                     | 0.73                     |
| B24  | 39            | 0.22                     | 0.45                    | 0.29                    | 3.58                    | 2.11                     | 0.03                     | 1.14                     | 3.37                     | 0.09                     | 0.75                     |
| B25  | 40            | 0.26                     | 0.50                    | 0.30                    | 3.29                    | 2.22                     | 0.05                     | 1.51                     | 4.00                     | 0.10                     | 0.73                     |
| B31  | 41            | 0.19                     | 0.51                    | 0.24                    | 5.64                    | 1.89                     | 0.06                     | 0.96                     | 2.30                     | 0.06                     | 0.79                     |
| B32  | 42            | 0.17                     | 0.43                    | 0.25                    | 4.58                    | 1.79                     | 0.04                     | 0.67                     | 2.35                     | 0.06                     | 0.79                     |
| B33  | 43            | 0.19                     | 0.45                    | 0.25                    | 3.86                    | 1.84                     | 0.04                     | 0.81                     | 2.68                     | 0.07                     | 0.70                     |
| B34  | 44            | 0.22                     | 0.46                    | 0.27                    | 3.49                    | 2.06                     | 0.04                     | 1.01                     | 3.06                     | 0.08                     | 0.65                     |
| B35  | 45            | 0.26                     | 0.48                    | 0.31                    | 3.25                    | 2.31                     | 0.05                     | 1.46                     | 4.43                     | 0.10                     | 0.69                     |
| B41  | 46            | 0.19                     | 0.55                    | 0.24                    | 5.41                    | 1.81                     | 0.05                     | 1.04                     | 2.70                     | 0.05                     | 0.82                     |
| B42  | 47            | 0.18                     | 0.43                    | 0.26                    | 4.29                    | 1.76                     | 0.03                     | 0.77                     | 2.81                     | 0.08                     | 0.78                     |
| B43  | 48            | 0.17                     | 0.38                    | 0.24                    | 3.40                    | 1.62                     | 0.02                     | 0.74                     | 2.75                     | 0.06                     | 0.64                     |
| B44  | 49            | 0.20                     | 0.41                    | 0.29                    | 3.22                    | 1.97                     | 0.03                     | 1.14                     | 3.55                     | 0.07                     | 0.67                     |
| B45  | 50            | 0.21                     | 0.50                    | 0.26                    | 3.35                    | 1.92                     | 0.05                     | 1.21                     | 3.45                     | 0.09                     | 0.74                     |
| B51  | 51            | 0.20                     | 0.62                    | 0.19                    | 5.20                    | 1.80                     | 0.07                     | 1.02                     | 2.84                     | 0.06                     | 0.90                     |
| B52  | 52            | 0.19                     | 0.55                    | 0.19                    | 4.88                    | 1.82                     | 0.06                     | 1.04                     | 2.94                     | 0.06                     | 0.89                     |
| B53  | 53            | 0.19                     | 0.55                    | 0.20                    | 4.69                    | 1.87                     | 0.05                     | 1.07                     | 3.16                     | 0.07                     | 0.92                     |
| B54  | 54            | 0.19                     | 0.53                    | 0.18                    | 4.12                    | 1.76                     | 0.06                     | 0.99                     | 2.95                     | 0.08                     | 0.83                     |
| B55  | 55            | 0.19                     | 0.63                    | 0.16                    | 4.32                    | 1.99                     | 0.07                     | 0.84                     | 3.15                     | 0.08                     | 1.01                     |
| C11  | 56            | 0.20                     | 0.65                    | 0.16                    | 5.61                    | 2.08                     | 0.07                     | 0.96                     | 2.56                     | 0.04                     | 0.94                     |
| C12  | 57            | 0.19                     | 0.59                    | 0.16                    | 4.99                    | 1.89                     | 0.06                     | 0.92                     | 2.42                     | 0.04                     | 0.93                     |
| C13  | 58            | 0.19                     | 0.57                    | 0.17                    | 4.66                    | 1.72                     | 0.06                     | 1.00                     | 2.68                     | 0.05                     | 0.86                     |
| C14  | 59            | 0.19                     | 0.59                    | 0.19                    | 4.41                    | 1.79                     | 0.06                     | 0.95                     | 2.76                     | 0.07                     | 0.96                     |
| C15  | 60            | 0.20                     | 0.63                    | 0.17                    | 4.22                    | 1.90                     | 0.08                     | 0.76                     | 2.70                     | 0.07                     | 0.87                     |
| C21  | 61            | 0.18                     | 0.58                    | 0.17                    | 5.42                    | 1.68                     | 0.06                     | 0.93                     | 1.92                     | 0.03                     | 0.81                     |
| C22  | 62            | 0.18                     | 0.52                    | 0.20                    | 4.66                    | 1.82                     | 0.04                     | 0.96                     | 2.27                     | 0.05                     | 0.78                     |

| Code             | Total samples | Mg (mg g <sup>-1</sup> ) | P (mg g <sup>-1</sup> ) | S (mg g <sup>-1</sup> ) | K (mg g <sup>-1</sup> ) | Zn (µg g <sup>-1</sup> ) | Ca (mg g <sup>-1</sup> ) | Mn (µg g <sup>-1</sup> ) | Fe (µg g <sup>-1</sup> ) | Cl (mg g <sup>-1</sup> ) | Cu (µg g <sup>-1</sup> ) |
|------------------|---------------|--------------------------|-------------------------|-------------------------|-------------------------|--------------------------|--------------------------|--------------------------|--------------------------|--------------------------|--------------------------|
| C23              | 63            | 0.18                     | 0.48                    | 0.19                    | 4.10                    | 1.71                     | 0.04                     | 1.01                     | 2.35                     | 0.03                     | 0.76                     |
| C24              | 64            | 0.21                     | 0.52                    | 0.22                    | 3.87                    | 1.84                     | 0.04                     | 1.18                     | 2.77                     | 0.08                     | 0.79                     |
| C25              | 65            | 0.22                     | 0.59                    | 0.19                    | 3.74                    | 1.83                     | 0.06                     | 1.06                     | 2.73                     | 0.07                     | 0.86                     |
| C31              | 66            | 0.18                     | 0.56                    | 0.18                    | 5.29                    | 1.74                     | 0.06                     | 0.89                     | 2.02                     | 0.04                     | 0.82                     |
| C32              | 67            | 0.17                     | 0.47                    | 0.19                    | 4.38                    | 1.62                     | 0.04                     | 0.90                     | 2.38                     | 0.05                     | 0.79                     |
| C33              | 68            | 0.20                     | 0.49                    | 0.21                    | 4.12                    | 1.83                     | 0.04                     | 1.02                     | 2.75                     | 0.06                     | 0.77                     |
| C34              | 69            | 0.21                     | 0.51                    | 0.25                    | 3.68                    | 1.90                     | 0.04                     | 1.13                     | 3.13                     | 0.07                     | 0.75                     |
| C35              | 70            | 0.22                     | 0.56                    | 0.22                    | 3.47                    | 2.02                     | 0.05                     | 1.19                     | 3.33                     | 0.07                     | 0.79                     |
| C41              | 71            | 0.18                     | 0.57                    | 0.16                    | 5.26                    | 1.70                     | 0.06                     | 0.91                     | 2.50                     | 0.03                     | 0.88                     |
| C42              | 72            | 0.17                     | 0.48                    | 0.17                    | 4.27                    | 1.61                     | 0.04                     | 0.94                     | 2.31                     | 0.04                     | 0.78                     |
| C43              | 73            | 0.19                     | 0.51                    | 0.21                    | 4.12                    | 1.81                     | 0.04                     | 1.09                     | 2.94                     | 0.05                     | 0.85                     |
| C44              | 74            | 0.20                     | 0.47                    | 0.20                    | 3.71                    | 1.80                     | 0.04                     | 1.08                     | 2.90                     | 0.06                     | 0.76                     |
| C45              | 75            | 0.21                     | 0.57                    | 0.19                    | 3.70                    | 1.87                     | 0.06                     | 1.04                     | 3.36                     | 0.09                     | 0.84                     |
| C51              | 76            | 0.18                     | 0.64                    | 0.13                    | 5.28                    | 2.01                     | 0.09                     | 0.86                     | 2.92                     | 0.04                     | 1.05                     |
| C52              | 77            | 0.17                     | 0.57                    | 0.14                    | 4.73                    | 1.73                     | 0.06                     | 0.88                     | 2.76                     | 0.04                     | 0.93                     |
| C53              | 78            | 0.17                     | 0.57                    | 0.15                    | 4.43                    | 1.77                     | 0.06                     | 0.84                     | 2.88                     | 0.05                     | 0.92                     |
| C54              | 79            | 0.18                     | 0.61                    | 0.16                    | 4.34                    | 2.05                     | 0.06                     | 0.91                     | 3.28                     | 0.06                     | 0.95                     |
| C55              | 80            | 0.19                     | 0.63                    | 0.16                    | 4.24                    | 1.79                     | 0.08                     | 0.75                     | 3.35                     | 0.07                     | 0.98                     |
| s. s.<br>(flesh) |               | 0.01                     | 0.04                    | 0.03                    | 0.25                    | 0.17                     | 0.006                    | 0.10                     | 0.43                     | 0.02                     | 0.07                     |

Mean of five tubers. s.e., standard errors of differences of means. S01–S05, skin, apex to base. A11–C55, flesh. A11 is top slice A, right strip 1, apical piece 1 in strip 1.

TABLE S2. ANOVA for mineral variation within tuber

| Sources of variance                 | Minerals |     |     |     |     |     |     |     |     |     |
|-------------------------------------|----------|-----|-----|-----|-----|-----|-----|-----|-----|-----|
|                                     | Mg       | P   | S   | Cl  | K   | Zn  | Ca  | Mn  | Fe  | Cu  |
| Slices                              | ***      | *** | *** | *** | *** | *** | *** | *   | *** | *** |
| Strips                              | ***      | *** | *** | ns  | *** | ns  | *** | *** | ns  | *** |
| Pieces                              | ***      | *** | *** | *** | *** | *** | *** | *** | *** | *   |
| Interactions                        |          |     |     |     |     |     |     |     |     |     |
| SlicexStrip                         | ns       | ns  | ns  | ns  | ns  | *   | *   | *** | ns  | ns  |
| SlicexPieces                        | ns       | ns  | ns  | ns  | *   | ns  | ns  | *** | ns  | *   |
| StripxPieces                        | ***      | ns  | ns  | ns  | *** | ns  | ns  | *** | ns  | ns  |
| SlicexStripxPieces                  | ns       | ns  | ns  | ns  | ns  | ns  | ns  | ns  | ns  | ns  |
| Comparison of symmetrical positions |          |     |     |     |     |     |     |     |     |     |
| Top vs Bottom slice                 | ***      | *   | *** | *** | ns  | *** | *** | **  | *** | **  |

\*, \*\* and \*\*\* are significant at 0.05, 0.01 and 0.001 levels, respectively. ns, not significant.
